# Supplementary material for: T-cell responses to SARS CoV-2 in unexposed South African women
Source: Research Square preprint supplement (doi:10.21203/rs.3.rs-471880/v1), 2021-05-06
Supplement: Supplementary file 1 [file 0e8fe84185773617cac6480a.docx]

**Table 1.** Characteristics of the South African women participating in the study

|  | **N=97** |
| --- | --- |
| 2013 enrolments | 55 (56.7) |
| 2017 enrolments | 42 (43.3) |
| Mean age (SD), years | 27.3 (6.0) |
| Living with HIV | 43 (44.3) |
| CD4+ cell count ≥350 cells/ml | 17 (42.5)  [40] |
| HIV viral load <40 copies/ml | 15 (42.9)  [35] |
| On antiretroviral therapy | 38 (88.4) |
| Pregnant | 71 (73.2) |
| Women in the second trimester | 23 (32.4) |
| Women in the third trimester | 48 (67.6) |

Results are n (%) unless stated otherwise.

Numbers in brackets represent the number of participants with available information.

SD: standard deviation.

**Table 2. Interferon g and Interleukin 2 responses among study participants after stimulation with SARS-CoV-2 peptide pools and whole virus**

|  | **Spike** | **Non-spike** | **CD8-A** | **CD8-B** | **Irradiated cell lysate** | **At least 1 response** |
| --- | --- | --- | --- | --- | --- | --- |
| **Interferon g** |  |  |  |  |  |  |
| **SFCs per 106 PBMCs geometric mean (95%CI)** |  |  |  |  |  |  |
| Overall pre-2020 participants | 8.0  (6.2, 10.3) | 8.3  (6.8, 10.0) | 7.6  (5.5, 10.4) | 21.2  (13.1, 34.3) | 5.3  (4.0, 7.1) |  |
| Pregnant women | 6.2  (4.8, 8.0) a | 8.5  (6.9, 10.5) | 6.9  (5.2, 9.3) | 20.0  (11.5, 34.8) | 5.4  (3.8, 7.5) |  |
| Non-pregnant women | 13.9  (8.2, 23.5) | 7.8  (4.9, 12.3) | 9.1  (4.0, 20.7) | 23.6  (8.8, 63.6) | 5.1  (2.5, 10.3) |  |
| Women living with HIV | 6.3  (4.5, 8.8) | 7.9  (6.0, 10.3) | 7.8  (4.6, 13.1) | 21.8  (10.1, 46.9) | 5.8  (3.6, 9.3) |  |
| Women without HIV | 9.6  (6.7, 13.8) | 8.6  (6.5, 11.4) | 7.4  (4.9, 11.2) | 20.7  (10.8, 39.8) | 5.0  (3.4, 7.4) |  |
| 2020 participants | 309.3  (153.1, 624.7) | 99.8  (52.2, 190.7) | 124.8  (59.4, 262.0) | 10.0  (3.8, 25.9) | 97.9  (48.1, 199.0) |  |
| **Responders (%)** |  |  |  |  |  |  |
| Overall pre-2020 participants | 6  (6.2) | 6  (6.2) | 5  (5.2) | 20  (20.6) | 1  (1.0) | 29  (29.9) |
| Pregnant women | 2  (2.8) a | 4  (5.6) | 2  (2.8) | 14 (19.7) | 1  (1.4) | 19  (26.8) |
| Non-pregnant women | 4  (15.4) | 2  (7.8) | 3  (11.5) | 6  (23.1) | 0 | 10  (38.5) |
| Women living with HIV | 0 b | 2  (4.7) | 2  (4.7) | 7  (16.3) | 1  (2.3) | 11  (25.6) |
| Women without HIV | 6  (11.1) | 4  (7.4) | 3  (5.6) | 13  (24.1) | 0 | 18  (33.3) |
| 2020 participants | 7  (100) | 7  (100) | 7  (100) | 2  (28.6) | 7  (100) | 7  (100) |
| **Interleukin 2** |  |  |  |  |  |  |
| **SFCs per 106 PBMCs geometric mean (95%CI)** |  |  |  |  |  |  |
| Overall pre-2020 participants | 10.0  (7.9, 12.6) | 12.6  (10.5, 15.2) | 6.7  (5.2, 8.6) | 9.4  (7.1, 12.4) | 8.4  (6.5, 10.9) |  |
| Pregnant women | 8.4  (6.4, 11.0) a | 13.7  (11.0, 17) | 6.6  (5.0, 8.7) | 9.7  (7.0, 13.4) | 8.0  (5.9, 10.9) |  |
| Non-pregnant women | 15.6  (10.1, 24.0) | 10.5  (7.3, 15.1) | 7.0  (3.6, 13.6) | 8.5  (4.6, 15.9) | 9.7  (5.6, 16.9) |  |
| Women living with HIV | 8.9  (6.0, 13.3) | 10.8  (7.7, 14.9) | 6.4  (4.1, 10) | 8.9  (5.8, 13.8) | 8.3  (5.5, 12.4) |  |
| Women without HIV | 10.6  (7.9, 14.4) | 14.1  (11.3, 17.5) | 6.9  (5.0, 9.5) | 9.7  (6.6, 14.2) | 8.5  (6.0, 12.3) |  |
| 2020 participants | 344.0  (195.5, 605.3) | 177.8  (103.8, 304.7) | 55.3  (30.9, 98.9) | 16.1  (8.9, 29.1) | 153.4  (81.7, 288.4) |  |
| **Responders (%)** |  |  |  |  |  |  |
| Overall pre-2020 participants | 15  (15.5) | 22  (22.7) | 6  (6.2) | 12  (12.4) | 3  (3.1) | 38  (39.2) |
| Pregnant women | 9  (12.7) | 18  (25.4) | 5  (7.0) | 10  (14.1) | 3  (4.2) | 29  (40.9) |
| Non-pregnant women | 6  (23.1) | 4  (15.4) | 1  (3.9) | 2  (7.7) | 0 | 9  (34.6) |
| Women living with HIV | 5  (11.6) | 8  (18.6) | 3  (7.0) | 4  (9.3) | 1  (2.3) | 11  (25.6) b |
| Women without HIV | 10  (18.5) | 14  (25.9) | 3  (5.6) | 8  (14.8) | 2  (3.7) | 27  (50.0) |
| 2020 participants | 7  (100) | 7  (100) | 6  (85.7) | 1  (14.3) | 7  (100) | 7  (100) |
| **Responders (%) to either Interferon g or Interleukin 2** |  |  |  |  |  |  |
| Overall pre-2020 participants | 17  (17.5) | 24  (24.7) | 10  (10.3) | 25  (25.8) | 4  (4.1) | 50  (51.6) |
| Pregnant women | 10  (14.1) | 20  (28.2) | 7  (9.9) | 19  (26.8) | 4  (5.6) | 37  (52.1) |
| Non-pregnant women | 7  (26.9) | 4  (15.4) | 3  (11.5) | 6  (23.1) | 0 | 13  (50.0) |
| Women living with HIV | 5  (11.6) | 9  (20.9) | 5  (11.6) | 9  (20.9) | 2  (4.7) | 17  (39.5) b |
| Women without HIV | 12  (22.2) | 15  (27.8) | 5  (9.3) | 16  (29.6) | 2  (3.7) | 33  (61.1) |
| 2020 participants | 7  (100) | 7  (100) | 7  (100) | 2  (28.6) | 7  (100) | 7  (100) |

Responders are women with ≥20 SFCs after subtracting media control and with concomitant ≥2-fold increase from media only stimulation

SFCs: Spot forming cells

95%CI: 95% confidence interval

ap-value < 0.05 pregnant vs. non-pregnant

bp-value < 0.05 living with HIV vs. without HIV
